# Supplementary material
Source: MDPI journal article supplement (https://www.mdpi.com/1424-8247/14/11/1095)
Supplement: s1 [file s1]

# Supplementary Material

## Antikinetoplastid activity of sesquiterpenes isolated from the zoanthid *Palythoa aff. clavata*

Carlos J. Bethencourt-Estrella<sup>1,2,3</sup>, Nathalia Nocchi<sup>4,5</sup>, Atteneri López-Arencibia<sup>1,2,3</sup>, Desirée San Nicolás-Hernández<sup>1,2,3</sup>, María L. Souto<sup>4,5</sup>, Blanca Suárez-Gómez<sup>4</sup>, Ana R. Díaz-Marrero<sup>4,\*</sup>, José J. Fernández<sup>4,5,\*</sup>, Jacob Lorenzo-Morales<sup>1,2,3,6\*</sup> and José E. Piñero<sup>1,2,3,6\*</sup>

### Table of Contents

| CONTENTS         |                                                                                                                                                                                                                                                                                               | Page |
|------------------|-----------------------------------------------------------------------------------------------------------------------------------------------------------------------------------------------------------------------------------------------------------------------------------------------|------|
| <b>Figure S1</b> | Overlays of the detection of chromatin condensation by Vybrant® Apoptosis Assay Kit n°5, Hoechst 33342/Propidium Iodide, changes on the plasmatic membrane permeability by SYTOX® Green staining, and reactive oxygen species by CellROX® Deep Red Reagent in <i>Leishmania amazonensis</i> . | 3    |
| <b>Figure S2</b> | Overlays of the detection of chromatin condensation by Vybrant® Apoptosis Assay Kit n°5, Hoechst 33342/Propidium Iodide, changes on the plasmatic membrane permeability by SYTOX® Green staining, and reactive oxygen species by CellROX® Deep Red Reagent in <i>Leishmania donovani</i> .    | 4    |
| <b>Figure S3</b> | Overlays of the detection of chromatin condensation by Vybrant® Apoptosis Assay Kit n°5, Hoechst 33342/Propidium Iodide, changes on the plasmatic membrane permeability by SYTOX® Green staining, and reactive oxygen species by CellROX® Deep Red Reagent in <i>T. cruzi</i> .               | 5    |
| <b>Table S1</b>  | Physical and spectroscopic data of compounds <b>1</b> and <b>2</b> [NMR: CDCl <sub>3</sub> , 500 MHz, 298K]                                                                                                                                                                                   | 6    |
| <b>Table S2</b>  | Physical and spectroscopic data of compounds <b>3-5</b> [NMR: CDCl <sub>3</sub> , 500 MHz, 298K]                                                                                                                                                                                              | 7    |
| <b>Table S3</b>  | Physical and spectroscopic data of compounds <b>6</b> and <b>7</b> [NMR: CDCl <sub>3</sub> , 500 MHz, 298K]                                                                                                                                                                                   | 8    |
| <b>Table S4</b>  | Physical and spectroscopic data of compounds <b>8</b> and <b>9</b> [NMR: CDCl <sub>3</sub> , 500 MHz, 298K]                                                                                                                                                                                   | 9    |
| <b>Table S5</b>  | Physical and spectroscopic data of (-)-nephtediol ( <b>10</b> ) [NMR: CDCl <sub>3</sub> , 500 MHz, 298K]                                                                                                                                                                                      | 10   |

|                 |                                                                                                    |    |
|-----------------|----------------------------------------------------------------------------------------------------|----|
| <b>Table S6</b> | Physical and spectroscopic data of compounds <b>11-13</b> [NMR: CDCl <sub>3</sub> , 500 MHz, 298K] | 11 |
|-----------------|----------------------------------------------------------------------------------------------------|----|

**Figure S1.** Overlays of the detection of chromatin condensation by Vybrant® Apoptosis Assay Kit n°5, Hoechst 33342/Propidium Iodide, changes on the plasmatic membrane permeability by SYTOX® Green staining, and reactive oxygen species by CellROX® Deep Red Reagent in *Leishmania amazonensis*.

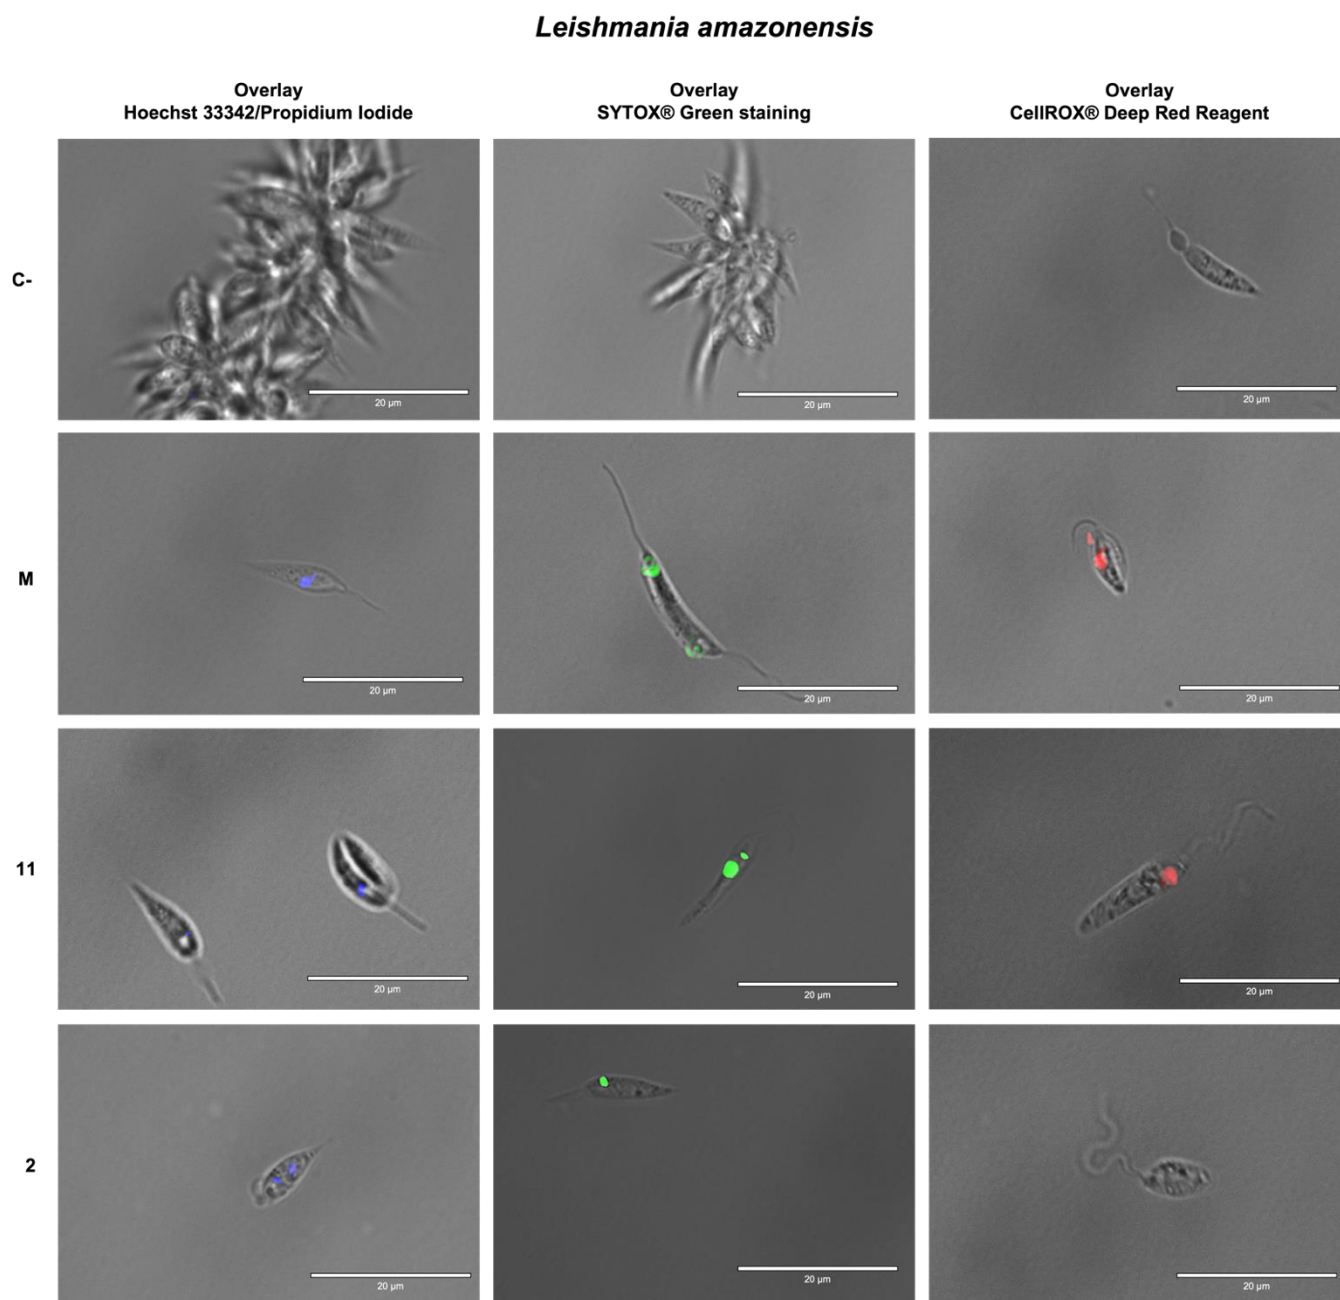

**Figure S2.** Overlays of the detection of chromatin condensation by Vybrant® Apoptosis Assay Kit n°5, Hoechst 33342/Propidium Iodide, changes on the plasmatic membrane permeability by SYTOX® Green staining, and reactive oxygen species by CellROX® Deep Red Reagent in *Leishmania donovani*.

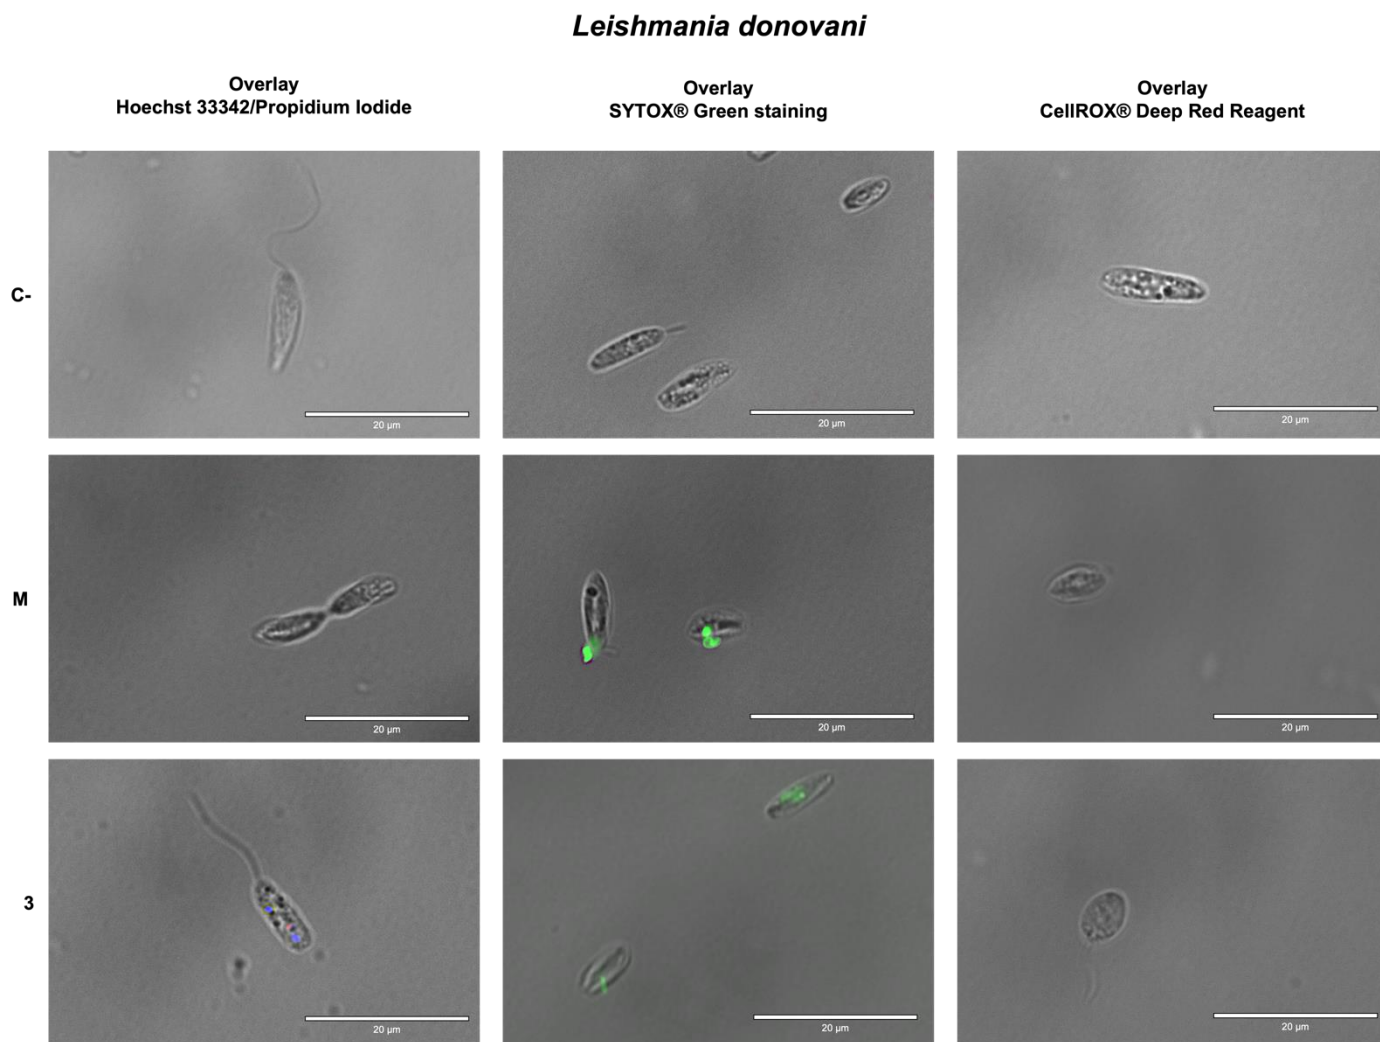

**Figure S3.** Overlays of the detection of chromatin condensation by Vybrant® Apoptosis Assay Kit n°5, Hoechst 33342/Propidium Iodide, changes on the plasmatic membrane permeability by SYTOX® Green staining, and reactive oxygen species by CellROX® Deep Red Reagent in *T. cruzi*.

***Trypanosoma cruzi***

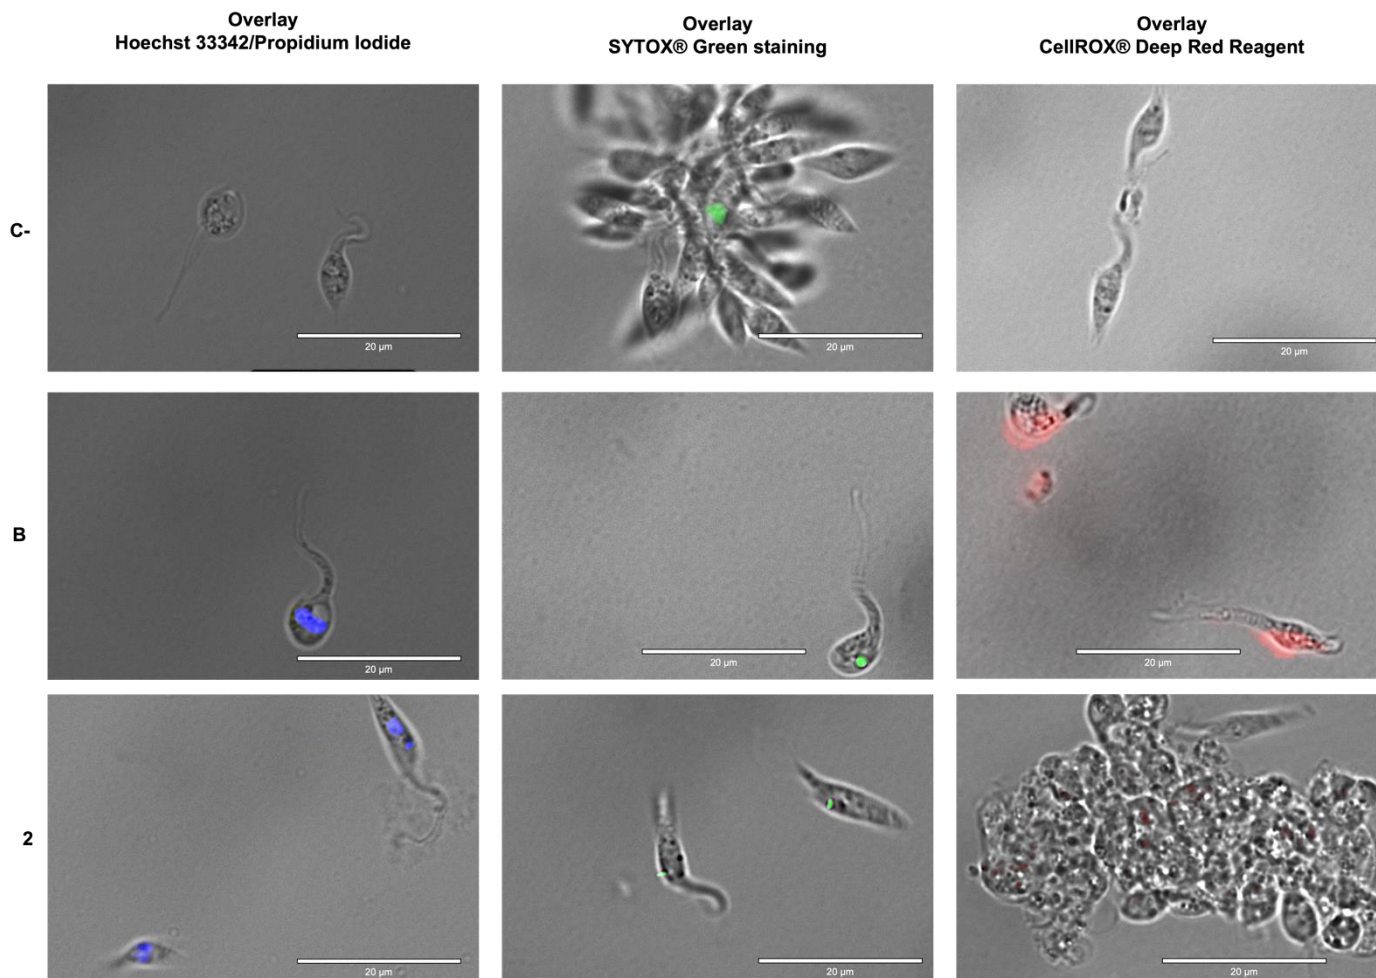

**Table S1.** Physical and spectroscopic data of compounds **1** and **2** [NMR: CDCl<sub>3</sub>, 500 MHz, 298K]

| 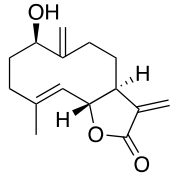 |                       |                    |   |               |  |                    |     |               |  |
|-----------------------------------------------------------------------------------|-----------------------|--------------------|---|---------------|-------------------------------------------------------------------------------------|--------------------|-----|---------------|--|
| Artemorin ( <b>1</b> )                                                            |                       |                    |   |               | Anhydroartemorin ( <b>2</b> )                                                       |                    |     |               |  |
| n° C                                                                              | $\delta^{13}\text{C}$ | $\delta^1\text{H}$ | m | <i>J</i> (Hz) | $\delta^{13}\text{C}$                                                               | $\delta^1\text{H}$ | m   | <i>J</i> (Hz) |  |
| <b>1</b>                                                                          | 78.3                  | 3.97               | m | -             | 204.9                                                                               | -                  | -   | -             |  |
| <b>2</b>                                                                          | 32.2                  | 1.95 – 1.98        | m | -             | 35.3                                                                                | 2.54               | m   | -             |  |
|                                                                                   |                       | 2.15 – 2.20        | m |               |                                                                                     | 3.16               | m   | -             |  |
| <b>3</b>                                                                          | 36.1                  | 1.95 – 1.98        | m | -             | 38.3                                                                                | 2.36               | ddd | 2.9, 8.7, 9.3 |  |
|                                                                                   |                       | 2.15 – 2.20        | m |               |                                                                                     | 2.54               | m   | -             |  |
| <b>4</b>                                                                          | 141.1                 | -                  | - | -             | 143.0                                                                               | -                  | -   | -             |  |
| <b>5</b>                                                                          | 122.8                 | 5.22               | d | 14.2          | 125.3                                                                               | 5.09               | d   | 10.0          |  |
| <b>6</b>                                                                          | 80.3                  | 4.40               | m | -             | 81.2                                                                                | 4.33               | dd  | 9.7, 10.0     |  |
| <b>7</b>                                                                          | 43.3                  | 2.81               | m | -             | 49.9                                                                                | 2.54               | m   | -             |  |
| <b>8</b>                                                                          | 25.6                  | 2.30 (2H)          | m | -             | 28.1                                                                                | 2.54 (2H)          | m   | -             |  |
| <b>9</b>                                                                          | 31.1                  | 1.62               | m | -             | 29.1                                                                                | 1.42               | m   | -             |  |
|                                                                                   |                       | 2.30               | m | -             |                                                                                     | 2.24               | m   | -             |  |
| <b>10</b>                                                                         | 157.9                 | -                  | - | -             | 142.4                                                                               | -                  | -   | -             |  |
| <b>11</b>                                                                         | 145.9                 | -                  | - | -             | 136.6                                                                               | -                  | -   | -             |  |
| <b>12</b>                                                                         | 165.0                 | -                  | - | -             | 169.5                                                                               | -                  | -   | -             |  |
| <b>13</b>                                                                         | 118.1                 | 5.45               | d | 3.5           | 119.2                                                                               | 5.48               | d   | 3.5           |  |
|                                                                                   |                       | 6.17               | d | 3.2           |                                                                                     | 6.22               | d   | 3.5           |  |
| <b>14</b>                                                                         | 110.7                 | 4.87               | s | -             | 123.8                                                                               | 5.66               | s   | -             |  |
|                                                                                   |                       | 5.21               | s | -             |                                                                                     | 5.82               | s   | -             |  |
| <b>15</b>                                                                         | 17.8                  | 1.72               | s | -             | 17.1                                                                                | 1.76               | s   | -             |  |

**[ $\alpha$ ]<sup>25</sup><sub>D</sub> +70.0 (c 0.08, CHCl<sub>3</sub>)**  
**IR  $\nu_{\text{max}}$ :** 3340, 2918, 2849, 1758, 1667 and 1446 cm<sup>-1</sup>  
**ESI-HRMS:** C<sub>15</sub>H<sub>20</sub>O<sub>3</sub>Na [M+Na]<sup>+</sup>; *m/z* 271.1307 (Calcd. 271.1310)

**[ $\alpha$ ]<sup>25</sup><sub>D</sub> +60.0 (c 0.02, CHCl<sub>3</sub>)**  
**IR  $\nu_{\text{max}}$ :** 2924, 2852, 1765, 1712, 1668 and 1454 cm<sup>-1</sup>  
**ESI-HRMS:** C<sub>15</sub>H<sub>18</sub>O<sub>4</sub>Na [M+Na]<sup>+</sup>; *m/z* 269.1198 (Calcd. 269.1154)

**Table S2.** Physical and spectroscopic data of compounds **3-5** [NMR: CDCl<sub>3</sub>, 500 MHz, 298K]

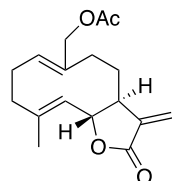

*cis,trans*-Costunolide-14-acetate (**3**)

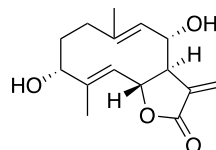

Tatridin A (**4**)

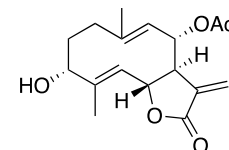

Tatridin A acetate (**5**)

| n° C      | $\delta^{13}\text{C}$ | $\delta^1\text{H}$ | m      | <i>J</i> (Hz)      | $\delta^{13}\text{C}$ | $\delta^1\text{H}$                    | m        | <i>J</i> (Hz)          | $\delta^{13}\text{C}$ | $\delta^1\text{H}$                    | m        | <i>J</i> (Hz)          |
|-----------|-----------------------|--------------------|--------|--------------------|-----------------------|---------------------------------------|----------|------------------------|-----------------------|---------------------------------------|----------|------------------------|
| <b>1</b>  | 97.6                  | 6.00               | d      | 9.2                | 35.2                  | ( $\alpha$ ) 2.30<br>( $\beta$ ) 1.93 | dd<br>dd | 6.1, 11.6<br>6.1, 11.6 | 35.3                  | ( $\alpha$ ) 2.30<br>( $\beta$ ) 1.91 | dd<br>m  | 6.7, 12.3<br>-         |
| <b>2</b>  | 31.2                  | 1.79<br>2.15       | m<br>m | -<br>-             | 27.2                  | ( $\alpha$ ) 1.74<br>( $\beta$ ) 2.00 | m<br>dd  | -<br>6.2, 12.0         | 27.3                  | ( $\alpha$ ) 1.76<br>( $\beta$ ) 2.03 | dd<br>dd | 6.7, 12.1<br>6.7, 12.1 |
| <b>3</b>  | 37.2                  | 2.31 (2H)          | m      | -                  | 66.7                  | 4.39                                  | m        | -                      | 66.9                  | 4.40                                  | m        | -                      |
| <b>4</b>  | 140.7                 | -                  | -      | -                  | 142.2                 | -                                     | -        | -                      | 142.9                 | -                                     | -        | -                      |
| <b>5</b>  | 123.2                 | 5.18               | d      | 9.5                | 126.8                 | 5.33                                  | d        | 10.2                   | 126.4                 | 5.33                                  | d        | 9.7                    |
| <b>6</b>  | 79.3                  | 4.66               | dd     | 9.5, 9.5           | 74.0                  | 4.54                                  | dd       | 9.4, 10.2              | 74.1                  | 4.62                                  | dd       | 9.4, 9.7               |
| <b>7</b>  | 43.9                  | 2.76               | dddd   | 3.2, 5.8, 5.9, 9.5 | 52.3                  | 2.80                                  | ddd      | 3.1, 9.4, 10.3         | 49.2                  | 3.03                                  | dd       | 9.4, 9.9               |
| <b>8</b>  | 25.4                  | 1.69<br>1.95       | m<br>m | -<br>-             | 71.1                  | 4.47                                  | dd       | 3.4, 10.3              | 73.1                  | 5.39                                  | dd       | 9.9, 10.6              |
| <b>9</b>  | 31.6                  | 2.14<br>2.31       | m<br>m | -<br>-             | 129.9                 | 4.99                                  | d        | 10.3                   | 126.0                 | 4.87                                  | d        | 10.6                   |
| <b>10</b> | 157.9                 | -                  | -      | -                  | 135.2                 | -                                     | -        | -                      | 137.9                 | -                                     | -        | -                      |
| <b>11</b> | 135.3                 | -                  | -      | -                  | 135.9                 | -                                     | -        | -                      | 136.9                 | -                                     | -        | -                      |
| <b>12</b> | 170.1                 | -                  | -      | -                  | 169.3                 | -                                     | -        | -                      | 169.1                 | -                                     | -        | -                      |
| <b>13</b> | 118.9                 | 5.46<br>6.19       | d<br>d | 3.2<br>3.2         | 123.6                 | 6.21<br>6.31                          | d<br>d   | 3.1<br>3.1             | 122.9                 | 5.75<br>6.29                          | d<br>d   | 3.3<br>3.3             |
| <b>14</b> | 87.1                  | 4.09<br>4.20       | d<br>d | 3.0<br>3.0         | 15.6                  | 1.78                                  | s        | -                      | 15.6                  | 1.90                                  | s        | -                      |
| <b>15</b> | 16.6                  | 1.83               | s      | -                  | 16.7                  | 1.83                                  | s        | -                      | 16.7                  | 1.83                                  | s        | -                      |
|           | 169.6 (C=O)           | -                  | -      | -                  | -                     | 1.47 (OH)                             | d        | 3.0                    | 169.8 (C=O)           | -                                     | -        | -                      |
|           | 21.1 (Me-O-)          | 2.09               | s      | -                  | -                     | 1.65 (OH)                             | d        | 3.4                    | 21.0 (Me-O-)          | 2.09                                  | s        | -                      |

$[\alpha]^{25}_{\text{D}} +38.3$  (c 0.06, CHCl<sub>3</sub>)

IR  $\nu_{\text{max}}$ : 2925, 2852, 2360, 1766, 1667 and 1445 cm<sup>-1</sup>

ESI-HRMS: C<sub>17</sub>H<sub>22</sub>O<sub>5</sub>Na [M+Na]<sup>+</sup>; *m/z* 329.1357

(Calcd. 329.1365)

$[\alpha]^{25}_{\text{D}} -33.3$  (c 0.03, CHCl<sub>3</sub>)

IR  $\nu_{\text{max}}$ : 3363, 2918, 2849, 2360, 1759 and 1666 cm<sup>-1</sup>

ESI-HRMS: C<sub>15</sub>H<sub>20</sub>O<sub>4</sub>Na [M+Na]<sup>+</sup>; *m/z*

287.1259 (Calcd. 287.1259)

$[\alpha]^{25}_{\text{D}} +26.7$  (c 0.06, CHCl<sub>3</sub>)

IR  $\nu_{\text{max}}$ : 3374, 2918, 2850, 1771, 1667 and 1438 cm<sup>-1</sup>

ESI-HRMS: C<sub>17</sub>H<sub>22</sub>O<sub>5</sub>Na [M+Na]<sup>+</sup>; *m/z* 329.1368 (Calcd.

329.1365)

**Table S3.** Physical and spectroscopic data of compounds **6** and **7** [NMR: CDCl<sub>3</sub>, 500 MHz, 298K]

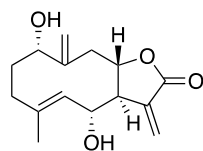

Tanachin (**6**)

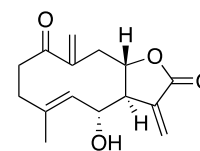

Tamirin (**7**)

| n° C                                                                                                                                                                                                                                                                            | $\delta^{13}\text{C}$ | $\delta^1\text{H}$                    | m        | J (Hz)             | $\delta^{13}\text{C}$                                                                                                                                                                                                                                                           | $\delta^1\text{H}$                    | m        | J (Hz)             |
|---------------------------------------------------------------------------------------------------------------------------------------------------------------------------------------------------------------------------------------------------------------------------------|-----------------------|---------------------------------------|----------|--------------------|---------------------------------------------------------------------------------------------------------------------------------------------------------------------------------------------------------------------------------------------------------------------------------|---------------------------------------|----------|--------------------|
| <b>1</b>                                                                                                                                                                                                                                                                        | 70.4                  | 3.84                                  | m        | -                  | 203.0                                                                                                                                                                                                                                                                           | -                                     | -        | -                  |
| <b>2</b>                                                                                                                                                                                                                                                                        | 31.2                  | ( $\alpha$ ) 2.17<br>( $\beta$ ) 2.05 | m<br>ddd | -<br>3.8, 8.8, 8.8 | 36.5                                                                                                                                                                                                                                                                            | 2.55<br>3.28                          | m<br>ddd | -<br>5.4, 5.4, 8.6 |
| <b>3</b>                                                                                                                                                                                                                                                                        | 34.4                  | ( $\alpha$ ) 2.11<br>( $\beta$ ) 2.26 | m<br>ddd | -<br>3.3, 5.5, 8.8 | 35.9                                                                                                                                                                                                                                                                            | 2.41<br>2.55                          | ddd<br>m | 5.4, 5.6, 8.6<br>- |
| <b>4</b>                                                                                                                                                                                                                                                                        | 136.0                 | -                                     | -        | -                  | 136.8                                                                                                                                                                                                                                                                           | -                                     | -        | -                  |
| <b>5</b>                                                                                                                                                                                                                                                                        | 131.6                 | 5.05                                  | d        | 10.0               | 131.9                                                                                                                                                                                                                                                                           | 5.08                                  | d        | 10.3               |
| <b>6</b>                                                                                                                                                                                                                                                                        | 71.5                  | 4.28                                  | ddd      | 3.3, 10.0, 10.0    | 70.1                                                                                                                                                                                                                                                                            | 4.16                                  | ddd      | 3.0, 10.3, 10.3    |
| <b>7</b>                                                                                                                                                                                                                                                                        | 51.9                  | 2.83                                  | ddd      | 3.0, 6.5, 10.0     | 50.2                                                                                                                                                                                                                                                                            | 2.74                                  | ddd      | 2.0, 9.7, 10.3     |
| <b>8</b>                                                                                                                                                                                                                                                                        | 79.0                  | 3.97                                  | m        | -                  | 76.5                                                                                                                                                                                                                                                                            | 3.96                                  | m        | -                  |
| <b>9</b>                                                                                                                                                                                                                                                                        | 42.0                  | ( $\alpha$ ) 2.39<br>( $\beta$ ) 2.96 | dd<br>d  | 10.3, 14.0<br>14.0 | 40.1                                                                                                                                                                                                                                                                            | ( $\alpha$ ) 2.15<br>( $\beta$ ) 3.42 | dd<br>d  | 11.7, 11.7<br>11.7 |
| <b>10</b>                                                                                                                                                                                                                                                                       | 146.7                 | -                                     | -        | -                  | 146.3                                                                                                                                                                                                                                                                           | -                                     | -        | -                  |
| <b>11</b>                                                                                                                                                                                                                                                                       | 137.1                 | -                                     | -        | -                  | 135.6                                                                                                                                                                                                                                                                           | -                                     | -        | -                  |
| <b>12</b>                                                                                                                                                                                                                                                                       | 170.0                 | -                                     | -        | -                  | 169.6                                                                                                                                                                                                                                                                           | -                                     | -        | -                  |
| <b>13</b>                                                                                                                                                                                                                                                                       | 125.7                 | 6.20<br>6.37                          | d<br>d   | 3.0<br>3.0         | 126.2                                                                                                                                                                                                                                                                           | 6.17<br>6.38                          | d<br>d   | 2.0<br>2.0         |
| <b>14</b>                                                                                                                                                                                                                                                                       | 115.2                 | 5.12<br>5.17                          | sa<br>sa | -<br>-             | 125.2                                                                                                                                                                                                                                                                           | 5.79<br>5.83                          | d<br>sa  | 1.8<br>-           |
| <b>15</b>                                                                                                                                                                                                                                                                       | 17.7<br>-             | 1.71<br>1.73 (OH)                     | s<br>d   | -<br>3.3           | 17.3                                                                                                                                                                                                                                                                            | 1.66                                  | s        | -                  |
| [ $\alpha$ ] <sub>D</sub> <sup>25</sup> +0.8 (c 0.07, CHCl <sub>3</sub> )<br>IR $\nu_{\text{max}}$ : 3390, 2925, 2855, 1756, 1659 and 1446 cm <sup>-1</sup><br>ESI-HRMS: C <sub>15</sub> H <sub>20</sub> O <sub>4</sub> Na [M+Na] <sup>+</sup> ; m/z 287.1253 (Calcd. 287.1259) |                       |                                       |          |                    | [ $\alpha$ ] <sub>D</sub> <sup>25</sup> -23.3 (c 0.06, CHCl <sub>3</sub> )<br>IR $\nu_{\text{max}}$ : 3444, 2922, 2851, 1758, 1672 and 1443cm <sup>-1</sup><br>ESI-HRMS: C <sub>15</sub> H <sub>18</sub> O <sub>4</sub> Na [M+Na] <sup>+</sup> ; m/z 285.1104 (Calcd. 285.1103) |                                       |          |                    |



**Table S4.** Physical and spectroscopic data of compounds **8** and **9** [NMR: CDCl<sub>3</sub>, 500 MHz, 298K]

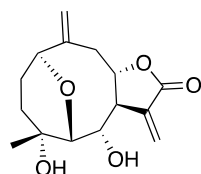

Isobadgerin (**8**)

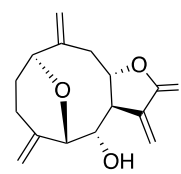

Dehydroxyisobadgerin (**9**)

| n° C                                                                                                                                                                                                                                                                                    | $\delta^{13}\text{C}$ | $\delta^1\text{H}$ | m   | <i>J</i> (Hz)  | $\delta^{13}\text{C}$                                                                                                                                                                                                                                                                   | $\delta^1\text{H}$ | m         | <i>J</i> (Hz)       |
|-----------------------------------------------------------------------------------------------------------------------------------------------------------------------------------------------------------------------------------------------------------------------------------------|-----------------------|--------------------|-----|----------------|-----------------------------------------------------------------------------------------------------------------------------------------------------------------------------------------------------------------------------------------------------------------------------------------|--------------------|-----------|---------------------|
| 1                                                                                                                                                                                                                                                                                       | 77.8                  | 4.44               | m   | -              | 75.4                                                                                                                                                                                                                                                                                    | 4.46               | dd        | 5.1, 5.7            |
| 2                                                                                                                                                                                                                                                                                       | 24.4                  | ( $\alpha$ ) 1.67  | m   | -              | 26.9                                                                                                                                                                                                                                                                                    | ( $\alpha$ ) 1.78  | dddd      | 2.6, 5.0, 5.3, 15.7 |
|                                                                                                                                                                                                                                                                                         |                       | ( $\beta$ ) 2.05   | m   | -              |                                                                                                                                                                                                                                                                                         | ( $\beta$ ) 2.26   | dddd      | 2.6, 5.1, 5.7, 15.7 |
| 3                                                                                                                                                                                                                                                                                       | 38.0                  | ( $\alpha$ ) 1.67  | m   | -              | 28.1                                                                                                                                                                                                                                                                                    | ( $\alpha$ ) 2.46  | m         |                     |
|                                                                                                                                                                                                                                                                                         |                       | ( $\beta$ ) 2.05   | m   | -              |                                                                                                                                                                                                                                                                                         | ( $\beta$ ) 2.35   | ddd       | 5.0, 5.3, 15.7      |
| 4                                                                                                                                                                                                                                                                                       | 70.8                  | -                  | -   | -              | 144.2                                                                                                                                                                                                                                                                                   |                    |           |                     |
| 5                                                                                                                                                                                                                                                                                       | 77.8                  | 2.86               | sa  | 2.2            | 73.0                                                                                                                                                                                                                                                                                    | 3.49               | sa        | -                   |
| 6                                                                                                                                                                                                                                                                                       | 72.3                  | 4.22               | dd  | 8.4, 10.3      | 72.3                                                                                                                                                                                                                                                                                    | 4.20               | ddd       | 2.3, 6.8, 7.9       |
| 7                                                                                                                                                                                                                                                                                       | 54.8                  | 3.21               | ddd | 3.5, 9.5, 10.3 | 53.6                                                                                                                                                                                                                                                                                    | 3.32               | ddd       | 3.5, 7.9, 10.4      |
| 8                                                                                                                                                                                                                                                                                       | 81.8                  | 4.10               | dd  | 9.5, 12.4      | 81.6                                                                                                                                                                                                                                                                                    | 4.06               | dd        | 10.4, 10.5          |
| 9                                                                                                                                                                                                                                                                                       | 42.0                  | ( $\alpha$ ) 2.45  | dd  | 10.75, 12.46   | 42.8                                                                                                                                                                                                                                                                                    | ( $\alpha$ ) 2.96  | d         | 12.7                |
|                                                                                                                                                                                                                                                                                         |                       | ( $\beta$ ) 2.95   | d   | 12.45          |                                                                                                                                                                                                                                                                                         | ( $\beta$ ) 2.62   | dd        | 10.5, 12.7          |
| 10                                                                                                                                                                                                                                                                                      | 145.1                 | -                  | -   | -              | 149.9                                                                                                                                                                                                                                                                                   | -                  | -         | -                   |
| 11                                                                                                                                                                                                                                                                                      | 127.8                 | -                  | -   | -              | 139.2                                                                                                                                                                                                                                                                                   | -                  | -         | -                   |
| 12                                                                                                                                                                                                                                                                                      | 169.0                 | -                  | -   | -              | 169.2                                                                                                                                                                                                                                                                                   | -                  | -         | -                   |
| 13                                                                                                                                                                                                                                                                                      | 121.0                 | 6.02               | d   | 3.14           | 121.4                                                                                                                                                                                                                                                                                   | 6.07               | d         | 3.5                 |
|                                                                                                                                                                                                                                                                                         |                       | 6.21               | d   | 3.55           |                                                                                                                                                                                                                                                                                         | 6.24               | d         | 3.5                 |
| 14                                                                                                                                                                                                                                                                                      | 117.5                 | 5.12               | d   | 1.70           | 117.6                                                                                                                                                                                                                                                                                   | 5.13               | d         | 2.0                 |
|                                                                                                                                                                                                                                                                                         |                       | 5.35               | sa  | -              |                                                                                                                                                                                                                                                                                         | 5.38               | sa        | -                   |
| 15                                                                                                                                                                                                                                                                                      | 21.7                  | 1.52               | s   | -              | 107.1                                                                                                                                                                                                                                                                                   | 4.95               | sa        | -                   |
|                                                                                                                                                                                                                                                                                         |                       |                    |     |                |                                                                                                                                                                                                                                                                                         | 4.98               | d         | 1.9                 |
|                                                                                                                                                                                                                                                                                         |                       |                    |     |                |                                                                                                                                                                                                                                                                                         | -                  | 2.03 (OH) | d                   |
| [ $\alpha$ ] <sup>25</sup> <sub>D</sub> -12.2 (c 0.09, CHCl <sub>3</sub> )<br>IR $\nu_{\text{max}}$ : 3362, 2921, 2851, 1766, 1660 and 1455 cm <sup>-1</sup><br>ESI-HRMS: C <sub>15</sub> H <sub>20</sub> O <sub>5</sub> Na [M+Na] <sup>+</sup> ; <i>m/z</i> 303.1209 (Calcd. 303.1208) |                       |                    |     |                | [ $\alpha$ ] <sup>25</sup> <sub>D</sub> +60.0 (c 0.12, CHCl <sub>3</sub> )<br>IR $\nu_{\text{max}}$ : 3457, 2918, 2850, 1762, 1661 and 1436 cm <sup>-1</sup><br>ESI-HRMS: C <sub>15</sub> H <sub>18</sub> O <sub>4</sub> Na [M+Na] <sup>+</sup> ; <i>m/z</i> 285.1103 (Calcd. 285.1103) |                    |           |                     |

**Table S5.** Physical and spectroscopic data of (-)-nephtediol (**10**) [NMR: CDCl<sub>3</sub>, 500 MHz, 298K]

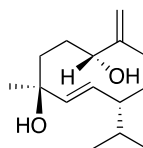

(-)- Nephtediol (**10**)

| C n <sup>o</sup> | $\delta^{13}\text{C}$ | $\delta^1\text{H}$ | mult. | <i>J</i> (Hz) |
|------------------|-----------------------|--------------------|-------|---------------|
| <b>1</b>         | 78.3                  | 3.94               | d     | 8.7           |
| <b>2</b>         | 28.3                  | 1.62               | m     |               |
|                  |                       | 1.93               | m     |               |
| <b>3</b>         | 38.5                  | 1.43               | m     |               |
|                  |                       | 1.84               | m     |               |
| <b>4</b>         | 72.3                  |                    |       |               |
| <b>5</b>         | 137.4                 | 5.22               | d     | 15.18         |
| <b>6</b>         | 130.0                 | 5.30               | dd    | 9.5, 15.25    |
| <b>7</b>         | 49.7                  | 1.87               | m     |               |
| <b>8</b>         | 29.5                  | 1.55               | m     |               |
|                  |                       | 1.96               | m     |               |
| <b>9</b>         | 28.2                  | 1.82               | m     |               |
|                  |                       | 2.25               | dd    | 12.0, 12.8    |
| <b>10</b>        | 151.1                 |                    |       |               |
| <b>11</b>        | 32.3                  | 1.50               | dd    | 6.7, 13.5     |
| <b>12</b>        | 20.5                  | 0.84               | d     | 6.7           |
| <b>13</b>        | 20.6                  | 0.89               | d     | 6.7           |
| <b>14</b>        | 111.4                 | 4.90               | s     |               |
|                  |                       | 5.13               | s     |               |
| <b>15</b>        | 23.9                  | 1.27               | s     |               |

$[\alpha]^{25}_{\text{D}}$  -70.0 (c 0.02, CHCl<sub>3</sub>)

IR  $\nu_{\text{max}}$ : 3314, 2927, 2869, 1723, 1670 and 1454 cm<sup>-1</sup>

ESI-HRMS: C<sub>15</sub>H<sub>26</sub>O<sub>2</sub>Na; [M+Na]<sup>+</sup> *m/z* 261.1833 (Calcd. 261.1831)

**Table S6.** Physical and spectroscopic data of compounds **11-13** [NMR: CDCl<sub>3</sub>, 500 MHz, 29

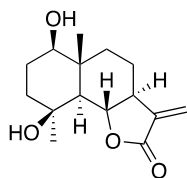

4β-Hydroxyarbusculin A (**11**)

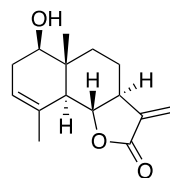

Santamarine (**12**)

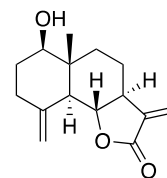

Reynosin (**13**)

| n° C                                                                                                                                                                                                                                                                                      | $\delta^{13}\text{C}$ | $\delta^1\text{H}$                    | m        | J (Hz)               | $\delta^{13}\text{C}$                                                                                                                                                                                                                                                                     | $\delta^1\text{H}$                    | m            | J (Hz)                                       | $\delta^{13}\text{C}$ | $\delta^1\text{H}$                                                                                                                                                                                                                                                                    | m        | J (Hz)               |
|-------------------------------------------------------------------------------------------------------------------------------------------------------------------------------------------------------------------------------------------------------------------------------------------|-----------------------|---------------------------------------|----------|----------------------|-------------------------------------------------------------------------------------------------------------------------------------------------------------------------------------------------------------------------------------------------------------------------------------------|---------------------------------------|--------------|----------------------------------------------|-----------------------|---------------------------------------------------------------------------------------------------------------------------------------------------------------------------------------------------------------------------------------------------------------------------------------|----------|----------------------|
| 1                                                                                                                                                                                                                                                                                         | 78.3                  | 3.46                                  | m        | -                    | 75.0                                                                                                                                                                                                                                                                                      | 3.68                                  | ddd          | 5.0, 6.0, 10.0                               | 78.1                  | 3.53                                                                                                                                                                                                                                                                                  | dd       | 4.5, 11.5            |
| 2                                                                                                                                                                                                                                                                                         | 28.5                  | ( $\alpha$ ) 1.64<br>( $\beta$ ) 1.76 | m<br>dd  | -<br>5.3, 12.0       | 32.8                                                                                                                                                                                                                                                                                      | ( $\alpha$ ) 1.97<br>( $\beta$ ) 2.40 | m<br>m       | -<br>-                                       | 31.2                  | ( $\alpha$ ) 1.85<br>( $\beta$ ) 1.57                                                                                                                                                                                                                                                 | m<br>m   | -<br>-               |
| 3                                                                                                                                                                                                                                                                                         | 38.0                  | ( $\alpha$ ) 1.64<br>( $\beta$ ) 1.81 | m<br>dd  | -<br>3.0, 12.0       | 21.2                                                                                                                                                                                                                                                                                      | 5.35                                  | d            | 2.7                                          | 33.5                  | ( $\alpha$ ) 2.14<br>( $\beta$ ) 2.34                                                                                                                                                                                                                                                 | m<br>ddd | -<br>1.0, 5.1, 13.8  |
| 4                                                                                                                                                                                                                                                                                         | 71.9                  | -                                     | -        | -                    | 133.1                                                                                                                                                                                                                                                                                     | -                                     | -            | -                                            | 143.3                 | -                                                                                                                                                                                                                                                                                     | -        | -                    |
| 5                                                                                                                                                                                                                                                                                         | 57.1                  | 1.86                                  | d        | 11.5                 | 51.2                                                                                                                                                                                                                                                                                      | 2.35                                  | d            | 11.0                                         | 52.9                  | 2.19                                                                                                                                                                                                                                                                                  | d        | 10.9                 |
| 6                                                                                                                                                                                                                                                                                         | 80.8                  | 4.12                                  | dd       | 11.5, 11.5           | 81.2                                                                                                                                                                                                                                                                                      | 3.95                                  | dd           | 11.0, 11.0                                   | 79.6                  | 4.03                                                                                                                                                                                                                                                                                  | dd       | 10.9, 10.9           |
| 7                                                                                                                                                                                                                                                                                         | 50.7                  | 2.60                                  | dddd     | 3.1, 3.3, 11.5, 11.5 | 51.0                                                                                                                                                                                                                                                                                      | 2-50                                  | ddd          | 3.2, 11.0, 12.8                              | 49.4                  | 2.54                                                                                                                                                                                                                                                                                  | ddd      | 3.1, 10.9, 11.2      |
| 8                                                                                                                                                                                                                                                                                         | 22.0                  | ( $\alpha$ ) 2.02<br>( $\beta$ ) 1.57 | ddd<br>m | 3.3, 11.5, 13.0<br>- | 21.2                                                                                                                                                                                                                                                                                      | ( $\alpha$ ) 2.10<br>( $\beta$ ) 1.67 | dddd<br>dddd | 3.9, 3.9, 6.4, 12.9<br>3.4, 12.8, 12.8, 12.9 | 21.4                  | ( $\alpha$ ) 2.09<br>( $\beta$ ) 1.60                                                                                                                                                                                                                                                 | m<br>m   | -<br>-               |
| 9                                                                                                                                                                                                                                                                                         | 39.1                  | ( $\alpha$ ) 1.30<br>( $\beta$ ) 2.01 | m<br>ddd | -<br>3.3, 3.3., 13.0 | 34.4                                                                                                                                                                                                                                                                                      | ( $\alpha$ ) 1.31<br>( $\beta$ ) 2.06 | ddd<br>ddd   | 3.9, 12.9, 12.9<br>4.0, 6.4, 12.9            | 35.5                  | ( $\alpha$ ) 1.36<br>( $\beta$ ) 2.10                                                                                                                                                                                                                                                 | ddd<br>m | 3.9, 13.1, 13.1<br>- |
| 10                                                                                                                                                                                                                                                                                        | 42.1                  | -                                     | -        | -                    | 40.5                                                                                                                                                                                                                                                                                      | -                                     | -            | -                                            | 42.9                  | -                                                                                                                                                                                                                                                                                     | -        | -                    |
| 11                                                                                                                                                                                                                                                                                        | 138.9                 | -                                     | -        | -                    | 138.5                                                                                                                                                                                                                                                                                     | -                                     | -            | -                                            | 139.1                 | -                                                                                                                                                                                                                                                                                     | -        | -                    |
| 12                                                                                                                                                                                                                                                                                        | 171.3                 | -                                     | -        | -                    | 170.6                                                                                                                                                                                                                                                                                     | -                                     | -            | -                                            | 170.5                 | -                                                                                                                                                                                                                                                                                     | -        | -                    |
| 13                                                                                                                                                                                                                                                                                        | 118.0                 | 5.46<br>6.13                          | d<br>d   | 3.1<br>3.1           | 116.7                                                                                                                                                                                                                                                                                     | 5.41<br>6.08                          | d<br>d       | 3.2<br>3.2                                   | 117.0                 | 5.42<br>6.09                                                                                                                                                                                                                                                                          | d<br>d   | 3.1<br>3.1           |
| 14                                                                                                                                                                                                                                                                                        | 13.9                  | 0.98                                  | s        | -                    | 11.0                                                                                                                                                                                                                                                                                      | 0.88                                  | s            | -                                            | 11.6                  | 0.82                                                                                                                                                                                                                                                                                  | s        | -                    |
| 15                                                                                                                                                                                                                                                                                        | 24.1                  | 1.37                                  | s        | -                    | 23.2                                                                                                                                                                                                                                                                                      | 1.84                                  | s            | -                                            | 110.1                 | 4.87                                                                                                                                                                                                                                                                                  | d        | 1.0                  |
|                                                                                                                                                                                                                                                                                           |                       | 3.09 (OH)                             | s        | -                    |                                                                                                                                                                                                                                                                                           | 1.41 (OH)                             | d            | 5.0                                          |                       | 4.99                                                                                                                                                                                                                                                                                  | sa       | -                    |
| [ $\alpha$ ] <sub>D</sub> <sup>25</sup> +15.0 (c 0.10, CHCl <sub>3</sub> )<br>IR $\nu_{\text{max}}$ : 3418, 2931, 2871, 1769, 1460 and 1411 cm <sup>-1</sup><br>ESI-HRMS: C <sub>15</sub> H <sub>22</sub> O <sub>4</sub> Na; [M+Na] <sup>+</sup> <i>m/z</i> 289.1417<br>(Calcd. 289.1416) |                       |                                       |          |                      | [ $\alpha$ ] <sub>D</sub> <sup>25</sup> +68.6 (c 0.07, CHCl <sub>3</sub> )<br>IR $\nu_{\text{max}}$ : 3347, 2918, 2848, 1762, 1439 and 1412 cm <sup>-1</sup><br>ESI-HRMS: C <sub>15</sub> H <sub>20</sub> O <sub>3</sub> Na; [M+Na] <sup>+</sup> <i>m/z</i> 271.1315<br>(Calcd. 271.1310) |                                       |              |                                              |                       | [ $\alpha$ ] <sub>D</sub> <sup>25</sup> +82.0 (c 0.20, CHCl <sub>3</sub> )<br>IR $\nu_{\text{max}}$ : 3454, 2928, 2851, 1768, 1460 and 1413 cm <sup>-1</sup><br>ESI-HRMS: C <sub>15</sub> H <sub>20</sub> O <sub>3</sub> Na; [M+Na] <sup>+</sup> <i>m/z</i> 271.1308 (calc. 271.1310) |          |                      |
